# Supplementary material
Source: PubMed Central journal article supplement (PMC2887069)
Supplement: mcq049_1.pdf [file mcq049_1.pdf]

## SUPPLEMENTARY DATA

FIG. S1. Sequence alignment tree of *MATE* genes along with *Phaseolus vulgaris* ESTs having high similarity to the known *MATE* genes. The alignment was done using the online MAFFT software (Kato *et al.* 2009. *Methods in Molecular Biology* 537: 39–64).

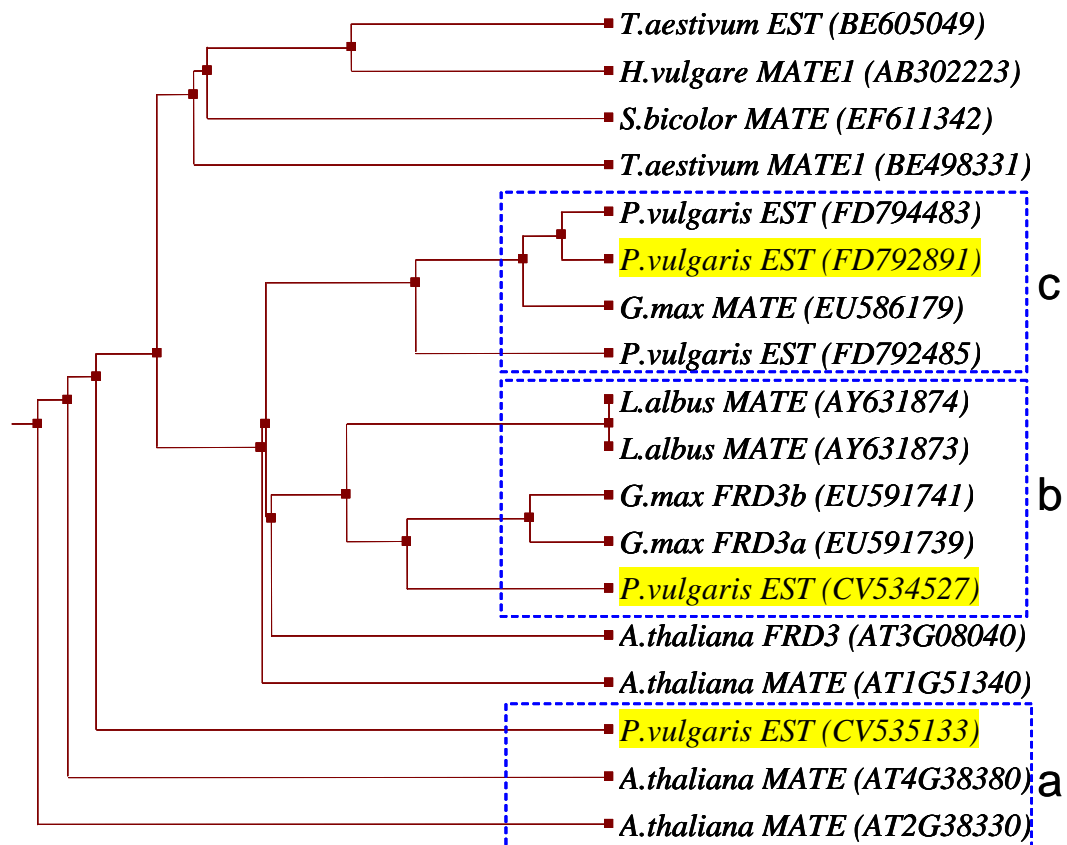

## SUPPLEMENTARY DATA

TABLE S1. Up-regulated genes induced by 4 h of Al treatment in the Al-resistant common bean genotype 'Quimbaya'. The SSH method was used to identify differentially expressed genes. Sequences that did not have significant similarity in the NCBI database (no hits) are excluded from this list.

| Clone ID.                             | GeneBank Acc. # | Gene product                                                      | Sequence identity | E_value | GO: Biological Process / putative function                                      |
|---------------------------------------|-----------------|-------------------------------------------------------------------|-------------------|---------|---------------------------------------------------------------------------------|
| <b>Primary metabolism</b>             |                 |                                                                   |                   |         |                                                                                 |
| 0_21                                  | NM_106704.3     | 3-isopropylmalate dehydrogenase                                   | 79%               | 6.E-120 | leucine biosynthetic process, metabolic process                                 |
| 0_77                                  | AY063233.1      | succinoaminoimidazolecarboximide ribonucleotide synthetase (pur7) | 97%               | 1.E-179 | purine nucleotides biosynthesis                                                 |
| 0_156                                 | M64246.1        | adenosine triphosphatase (atpa)                                   | 99%               | 0.E+00  | ATP synthesis coupled proton transport                                          |
| <b>Stress response/ Plant defence</b> |                 |                                                                   |                   |         |                                                                                 |
| 0_175                                 | DQ118114.1      | trehalose-6-phosphate phosphatase                                 | 85%               | 3.E-123 | trehalose biosynthetic process, desiccation tolerance                           |
| 0_178                                 | DQ340249.1      | cytochrome P450 monooxygenase (CYP51G1)                           | 92%               | 0.E+00  | plant defense                                                                   |
| 0_23                                  | U54703.1        | dehydrin                                                          | 99%               | 0.E+00  | response drought/osmotic stress                                                 |
| 0_27                                  | AF149279.2      | peroxidase 4 precursor (FBP4)                                     | 99%               | 0.E+00  | H <sub>2</sub> O <sub>2</sub> catabolic process, response to oxidative stress   |
| 0_164                                 | AF149277.1      | peroxidase 1 precursor (FBP1)                                     | 79%               | 1.E-104 | H <sub>2</sub> O <sub>2</sub> catabolic process, response to oxidative stress   |
| 0_181                                 | X06411.1        | chalcone synthase                                                 | 94%               | 6.E-70  | flavonoid biosynthesis, response to oxidative stress, wounding                  |
| 0_79                                  | M99431.1        | heat shock protein 83 (Hsp83)                                     | 82%               | 1.E-154 | stress response, protein folding (stabilize proteins)                           |
| 0_84                                  | BI497821.1      | heat shock protein DnaJ                                           | 75%               | 6.E-48  | stress response, protein folding (stabilize proteins)                           |
| 0_16                                  | AF192758.1      | indole-3-acetic acid induced protein ARG-2 homolog                | 85%               | 8.E-43  | response to stress                                                              |
| 0_148                                 | AB073552.1      | t-complex polypeptide 1                                           | 80%               | 7.E-88  | protein folding, chaperonin for tubulin and actin                               |
| 0_182                                 | AB002667.1      | 1-aminocyclopropane-1-carboxylic acid oxidase (ACC-oxidase)       | 92%               | 0.E+00  | ethylene biosynthesis, stress response                                          |
| <b>Signal transduction</b>            |                 |                                                                   |                   |         |                                                                                 |
| 0_38                                  | NM_115950.3     | guanine nucleotide exchange family protein                        | 71%               | 4.E-91  | regulation of ARF protein signal transduction                                   |
| 0_137                                 | AJ299064.1      | GTP-binding protein                                               | 88%               | 0.E+00  | signal transduction, intracellular protein transport                            |
| 0_64                                  | U64917.1        | farnesylated protein GMFP7                                        | 70%               | 1.E-15  | signal transduction, metal ion transport                                        |
| 0_71                                  | DQ531849.1      | ADP-ribosylation factor 1 (ARF1)                                  | 86%               | 8.E-157 | small GTPase mediated signal transduction                                       |
| 0_28                                  | EU019557.1      | WRKY9                                                             | 85%               | 7.E-132 | transcription regulation, DNA-dependent                                         |
| 0_183                                 | EU418733.1      | STOP1 (C2-H2 zinc finger protein)                                 | 84%               | 0.E+00  | transcription regulation, response to acidity, response to Al <sup>3+</sup> ion |
| <b>Transcription factor</b>           |                 |                                                                   |                   |         |                                                                                 |
| 0_180                                 | AY091454.1      | methionyl-tRNA synthetase                                         | 74%               | 1.E-49  | methionyl-tRNA aminoacylation, response to cadmium ion,                         |
| 0_57                                  | NM_104171.2     | brix domain-containing protein                                    | 77%               | 2.E-163 | ribosome biogenesis and rRNA binding                                            |
| 0_7                                   | NM_111591.3     | 60S ribosomal protein L13A (RPL13aA)                              | 78%               | 2.E-100 | translation                                                                     |

| <b>Clone ID.</b>                                | <b>GeneBank Acc. #</b> | <b>Gene product</b>                                     | <b>Sequence identity</b> | <b>E_value</b> | <b>GO: Biological Process / putative function</b>         |
|-------------------------------------------------|------------------------|---------------------------------------------------------|--------------------------|----------------|-----------------------------------------------------------|
| 0_17                                            | AY935814.1             | 26S ribosomal RNA                                       | 98%                      | 4.E-148        | translation                                               |
| 0_20                                            | X17535.1               | ribosomal RNA (5.8S, 18S & 25S)                         | 96%                      | 8.E-163        | translation                                               |
| 0_22                                            | AF074398.1             | ribosomal RNA gene (5.8S, ITS1 & ITS2)                  | 99%                      | 0.E+00         | translation                                               |
| 0_25                                            | DQ826356.1             | ribosomal protein S8                                    | 81%                      | 2.E-76         | translation                                               |
| 0_36                                            | M31024.1               | ribosomal protein S11                                   | 90%                      | 2.E-88         | translation                                               |
| 0_47                                            | NM_115247.3            | 40S ribosomal protein S3                                | 82%                      | 1.E-135        | translation                                               |
| 0_56                                            | AF115165.1             | ribosomal RNA (small subunit, 5.8S)                     | 100%                     | 0.E+00         | translation                                               |
| 0_155                                           | X17535.1               | ribosomal RNA gene (5.8S, 18S, 25S & ITS)               | 96%                      | 8.E-163        | translation                                               |
| 0_179                                           | DQ008820.1             | ribosomal RNA ( large subunit, mitochondrial)           | 98%                      | 0.E+00         | translation                                               |
| <b><i>Transport</i></b>                         |                        |                                                         |                          |                |                                                           |
| 0_153                                           | DQ072165.1             | mitochondrial voltage-dependent anion-selective channel | 97%                      | 1.E-154        | anion transport                                           |
| 0_163                                           | U36430.1               | dynamamin-like protein SDL5A                            | 87%                      | 2.E-30         | vesicle trafficking, endocytosis, cell cycle, cytokinesis |
| 0_9                                             | U97023.1               | putative aquaporin-1 (Mip-1)                            | 97%                      | 0.E+00         | transport                                                 |
| 0_81                                            | AF275315.1             | water-selective transport intrinsic membrane protein 1  | 82%                      | 2.E-163        | transport                                                 |
| 0_139                                           | DQ450071.1             | putative major intrinsic protein                        | 82%                      | 8.E-100        | transport                                                 |
| <b><i>Cytoskeleton/Cell wall associated</i></b> |                        |                                                         |                          |                |                                                           |
| 0_45                                            | NM_100817.3            | glucan endo-1,3-beta-glucosidase-related                | 69%                      | 3.E-31         | cell wall biogenesis/degradation, plant defense           |
| <b><i>Protein degradation</i></b>               |                        |                                                         |                          |                |                                                           |
| 0_6                                             | NM_119786.3            | serine carboxypeptidase S28 family protein              | 72%                      | 6.E-89         | proteolysis                                               |
| 0_80                                            | NM_128670.4            | peptidase (serine-type peptidase)                       | 66%                      | 1.E-33         | proteolysis                                               |
| 0_76                                            | AF527442.1             | polyubiquitin 2                                         | 91%                      | 5.E-90         | protein modification                                      |
| 0_157                                           | D28123.1               | ubiquitin                                               | 85%                      | 0.E+00         | protein modification                                      |
| <b><i>unclassified</i></b>                      |                        |                                                         |                          |                |                                                           |
| 0_172                                           | NM_203086.2            | phospholipase/carboxylesterase family protein           | 81%                      | 2.E-88         | unknown                                                   |
| <b><i>unknown</i></b>                           |                        |                                                         |                          |                |                                                           |
| 0_1                                             | DQ306838.1             | unknown                                                 | 78%                      | 2.E-32         | unknown                                                   |
| 0_39                                            | AP004949.1             | unknown                                                 | 73%                      | 2.E-49         | unknown                                                   |
| 0_69                                            | CR962130.3             | unknown                                                 | 74%                      | 4.E-34         | unknown                                                   |
| 0_72                                            | NM_118838.4            | unknown                                                 | 75%                      | 1.E-129        | unknown                                                   |
| 0_177                                           | AC153643.25            | unknown                                                 | 70%                      | 3.E-55         | unknown                                                   |

TABLE S2. Down-regulated genes induced by 4 h of AI treatment in the AI-resistant common bean genotype ‘Quimbaya’. The SSH method was used to identify differentially expressed genes. Sequences that did not have a significant similarity in the NCBI database (no hits) are excluded from this list.

| Clone ID.                                | GeneBank Acc. # | Gene product                                  | Sequence identity | E-value | GO: Biological Process / Putative function                    |
|------------------------------------------|-----------------|-----------------------------------------------|-------------------|---------|---------------------------------------------------------------|
| <b>Primary metabolism</b>                |                 |                                               |                   |         |                                                               |
| 4_38                                     | XM_002529320.1  | putative acyltransferase                      | 86%               | 6.E-22  | fatty acid biosynthetic process, lipid metabolism             |
| 4_73                                     | AF452451.1      | cysteine synthase                             | 89%               | 3.E-97  | cysteine biosynthetic process from serine                     |
| 4_81                                     | AY496909.1      | enolase                                       | 95%               | 2.E-163 | glycolysis                                                    |
| 4_86                                     | L12157.1        | NADP-specific isocitrate dehydrogenase (idh1) | 88%               | 2.E-138 | tricarboxylic acid cycle, glyoxylate cycle                    |
| 4_26                                     | AF191098.1      | nucleoside diphosphate kinase (ndpk)          | 78%               | 4.E-76  | nucleosides triphosphate (CTP, GTP & UTP) biosynthesis        |
| 4_76                                     | F575931.1       | adenosine kinase 2                            | 77%               | 3.E-46  | purine ribonucleoside salvage                                 |
| 4_6                                      | NM_100850.2     | putative phosphoglyceromutase                 | 79%               | 7.E-92  | glycolysis, response to cadmium ion, response to cold         |
| <b>Stress response/ Plant defence</b>    |                 |                                               |                   |         |                                                               |
| 4_57                                     | U20502.1        | calnexin                                      | 80%               | 5.E-119 | protein folding, response to salt stress                      |
| 4_3                                      | DQ340238.1      | cytochrome P450 monooxygenase (CYP81E11)      | 78%               | 4.E-95  | plant defense                                                 |
| 4_111                                    | DQ340234.1      | cytochrome P450 monooxygenase (CYP83E8)       | 73%               | 3.E-34  | plant defense                                                 |
| 4_131                                    | XM_002526702.1  | chaperone protein dnaJ                        | 81%               | 4.E-91  | stress response, protein folding                              |
| 4_37                                     | AJ011939.1      | peroxidase                                    | 70%               | 2.E-24  | response to oxidative stress                                  |
| <b>Transcription factor</b>              |                 |                                               |                   |         |                                                               |
| 4_137                                    | J03919.1        | auxin-regulated protein (Aux28)               | 94%               | 0.E+00  | auxin mediated signaling pathway, regulation of transcription |
| 4_65                                     | DQ787051.1      | transcription factor bZIP110                  | 75%               | 2.E-80  | regulation of transcription, DNA-dependent                    |
| <b>Translation</b>                       |                 |                                               |                   |         |                                                               |
| 4_17                                     | AK226319.1      | putative ribophorin I                         | 73%               | 1.E-38  | protein amino acid glycosylation                              |
| 4_130                                    | XM_002534101.1  | ribophorin                                    | 78%               | 1.E-57  | protein amino acid glycosylation                              |
| 4_12                                     | AF528526.1      | 40S ribosomal S4 protein                      | 88%               | 1.E-172 | translation                                                   |
| 4_112                                    | M31024.1        | ribosomal protein S11                         | 89%               | 1.E-83  | translation                                                   |
| 4_52                                     | X56856.1        | elongation factor EF-1a                       | 90%               | 0.E+00  | translational elongation                                      |
| <b>Transport</b>                         |                 |                                               |                   |         |                                                               |
| 4_136                                    | AJ003197.1      | adenine nucleotide translocator               | 80%               | 3.E-27  | ADP/ATP transport                                             |
| 4_117                                    | U97023.1        | putative aquaporin-1 (Mip-1)                  | 97%               | 0.E+00  | Water transport                                               |
| 4_135                                    | DQ087218.1      | aquaporin (Aqp1)                              | 100%              | 2.E-149 | Water transport                                               |
| 4_32                                     | AB107919.1      | AUX1-like auxin influx carrier protein        | 90%               | 6.E-74  | auxin polar transport, auxin mediated signaling pathway       |
| 4_45                                     | AK226470.1      | oxoglutarate/malate translocator-like protein | 81%               | 3.E-46  | transport                                                     |
| 4_55                                     | U34333.1        | proline-rich 14 kDa protein                   | 99%               | 0.E+00  | lipid transport                                               |
| 4_75                                     | XM_002510718.1  | organic anion transporter                     | 79%               | 1.E-93  | organic anion transport                                       |
| 4_22                                     | AY220098.1      | vacuolar ATPase subunit E                     | 98%               | 0.E+00  | ATP hydrolysis coupled proton transport                       |
| <b>Cytoskeleton/Cell wall associated</b> |                 |                                               |                   |         |                                                               |
| 4_100                                    | U60500.1        | actin (Soy57)                                 | 96%               | 3.E-116 | major component of the cytoskeleton, cell motility            |
| 4_49                                     | DQ340400.1      | endo-1,4-beta-glucanase precursor (Cel7)      | 93%               | 2.E-175 | cell wall modification, plant cell elongation                 |

| <b>Clone ID.</b>           | <b>GeneBank Acc. #</b> | <b>Gene product</b>                               | <b>Sequence identity</b> | <b>E-value</b> | <b>GO: Biological Process / Putative function</b>      |
|----------------------------|------------------------|---------------------------------------------------|--------------------------|----------------|--------------------------------------------------------|
| 4_133                      | NM_102471.4            | glycine-rich protein                              | 71%                      | 5.E-43         | cell wall organization                                 |
| 4_19                       | NM_180089.1            | dynamamin-related protein (ADL1D)                 | 76%                      | 4.E-76         | microtubule-associated force-producing protein         |
| 4_2                        | AJ520103.1             | 65kD microtubule associated protein               | 82%                      | 3.E-156        | building of cortical microtubules, cell expansion      |
| 4_53                       | X81982.1               | profilin                                          | 99%                      | 5.E-125        | actin cytoskeleton organization                        |
| <b>Protein degradation</b> |                        |                                                   |                          |                |                                                        |
| 4_15                       | AJ006095.1             | 26S protease regulatory subunit 6                 | 90%                      | 5.E-164        | protein catabolic process                              |
| 4_11                       | AP009544.1             | subtilase                                         | 89%                      | 4.E-32         | proteolysis, negative regulation of catalytic activity |
| <b>unclassified</b>        |                        |                                                   |                          |                |                                                        |
| 4_64                       | NM_119879.2            | copper ion binding (SKS15)                        | 68%                      | 8.E-60         | oxidation reduction                                    |
| 4_5                        | AM503587.1             | parvulin-type peptidyl-prolyl cis/trans isomerase | 84%                      | 4.E-51         | protein folding                                        |
| 4_24                       | NM_100673.3            | SIT4 phosphatase-associated family protein        | 85%                      | 5.E-50         | unknown                                                |
| <b>Unknown</b>             |                        |                                                   |                          |                |                                                        |
| 4_8                        | EU196765.1             | unknown                                           | 98%                      | 0.E+00         | unknown                                                |
| 4_16                       | AC175047.3             | unknown                                           | 81%                      | 2.E-49         | unknown                                                |
| 4_20                       | AC155881.2             | unknown                                           | 77%                      | 4.E-32         | unknown                                                |
| 4_28                       | AC157349.7             | unknown                                           | 77%                      | 3.E-53         | unknown                                                |
| 4_58                       | NM_202364.2            | unknown                                           | 70%                      | 6.E-74         | unknown                                                |
| 4_62                       | AP004577.1             | unknown                                           | 81%                      | 2.E-67         | unknown                                                |
| 4_67                       | NM_121313.4            | unknown                                           | 75%                      | 8.E-41         | unknown                                                |
| 4_69                       | AP006699.1             | unknown                                           | 84%                      | 2.E-87         | unknown                                                |
| 4_84                       | NM_001071150.1         | unknown                                           | 70%                      | 4.E-38         | unknown                                                |
| 4_87                       | DQ181626.1             | unknown                                           | 78%                      | 2.E-66         | unknown                                                |
| 4_113                      | AK246332.1             | unknown                                           | 83%                      | 5.E-50         | unknown                                                |
| 4_115                      | NM_001084815.1         | unknown                                           | 68%                      | 1.E-38         | unknown                                                |
| 4_119                      | AC140026.11            | unknown                                           | 81%                      | 2.E-66         | unknown                                                |
| 4_121                      | NM_001054328.1         | unknown                                           | 86%                      | 2.E-41         | unknown                                                |
| 4_122                      | DQ306777.1             | unknown                                           | 83%                      | 6.E-55         | unknown                                                |
| 4_127                      | AC199697.2             | unknown                                           | 83%                      | 5.E-50         | unknown                                                |
